# Supplementary material for: Two novel families of plasmids from hyperthermophilic archaea encoding new families of replication proteins
Source: PubMed Central journal article supplement — Nucleic Acids Res. 2010 Apr 18;38(15):5088–104. doi: 10.1093/nar/gkq236 (PMC2926602; doi:10.1093/nar/gkq236), 2010-04-18

**Figure S11A. Genomic regions surrounding CAGs.** Blue columns represent atypical genes (assigned value = 1) whereas blanks between the columns represent non-atypical genes (assigned value = 0). The green horizontal lines above the graphics represent the core genes shared by these elements. Black arrows show the position of integrases and pink columns represent the tRNA genes.

**Figure S11B-E. Evolutionary relationship between CAGs of pT26-2 family.** pT26-2 (brown), TKV2, TKV3, PHV1, MMPV1, MMC7V1, MMC7V2 and MMC6V1 share core genes and are linked with bold lines. These elements share at least 5, 4, 3 or 2 homologues (according to fixed threshold) with integrated elements detected in other archaea (Euryarchaeota and Crenarchaeota) (Cortez *et al.*, 2009). Each integrated element is represented as a spot colored according to the group the element belongs to: light blue for Thermococcales, pink for Methanococcales, dark blue for Methanosarcinales, green for Halobacteriales, mauve for Thermoplasmatales and dark red for Sulfolobales.

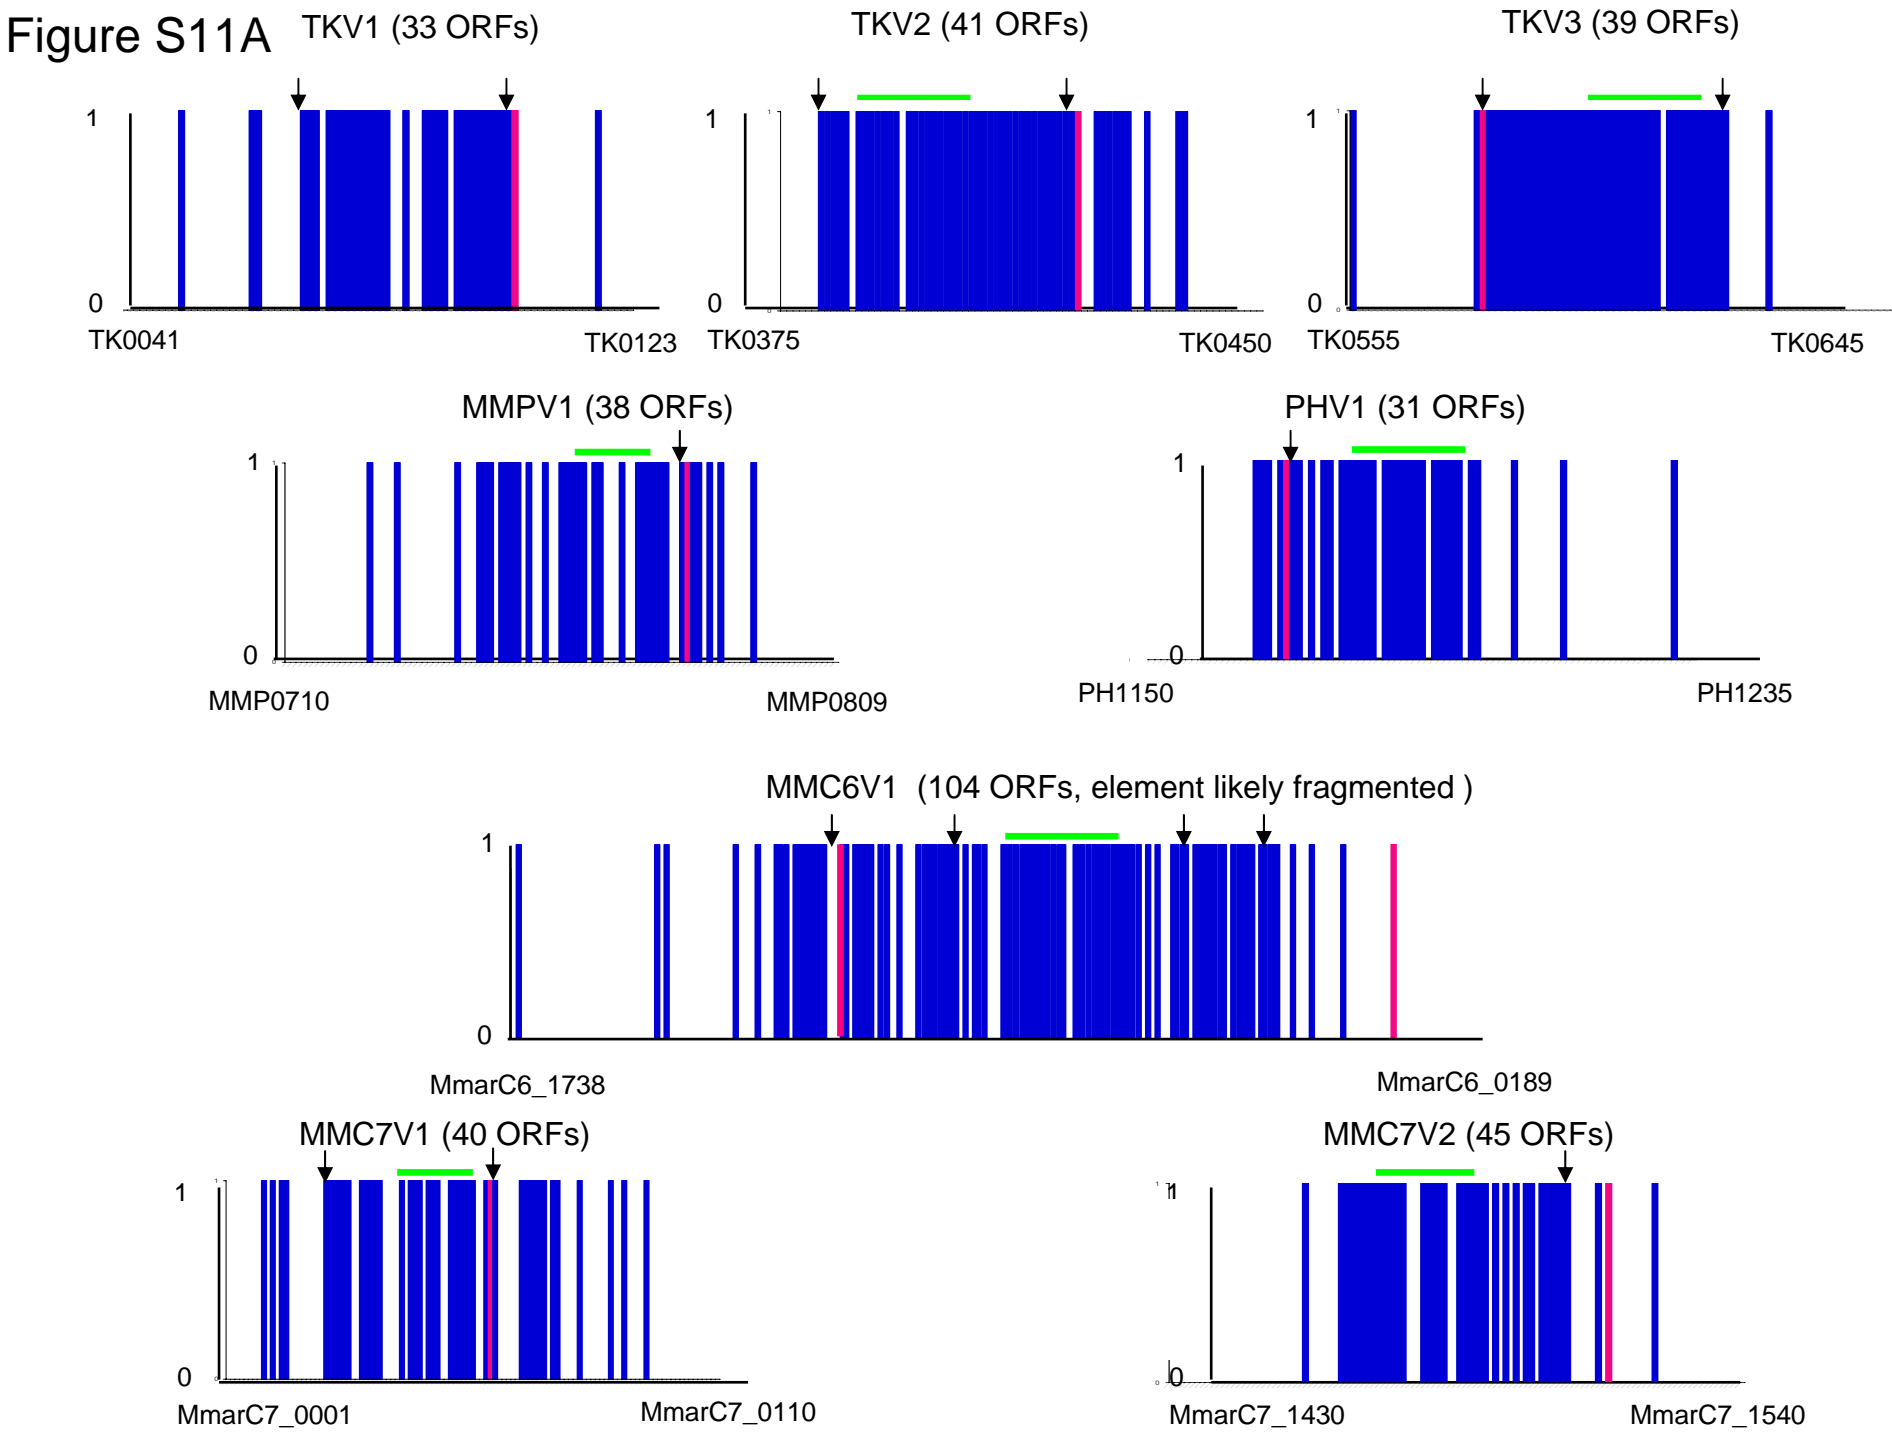

Figure S11B

Threshold = Five genes

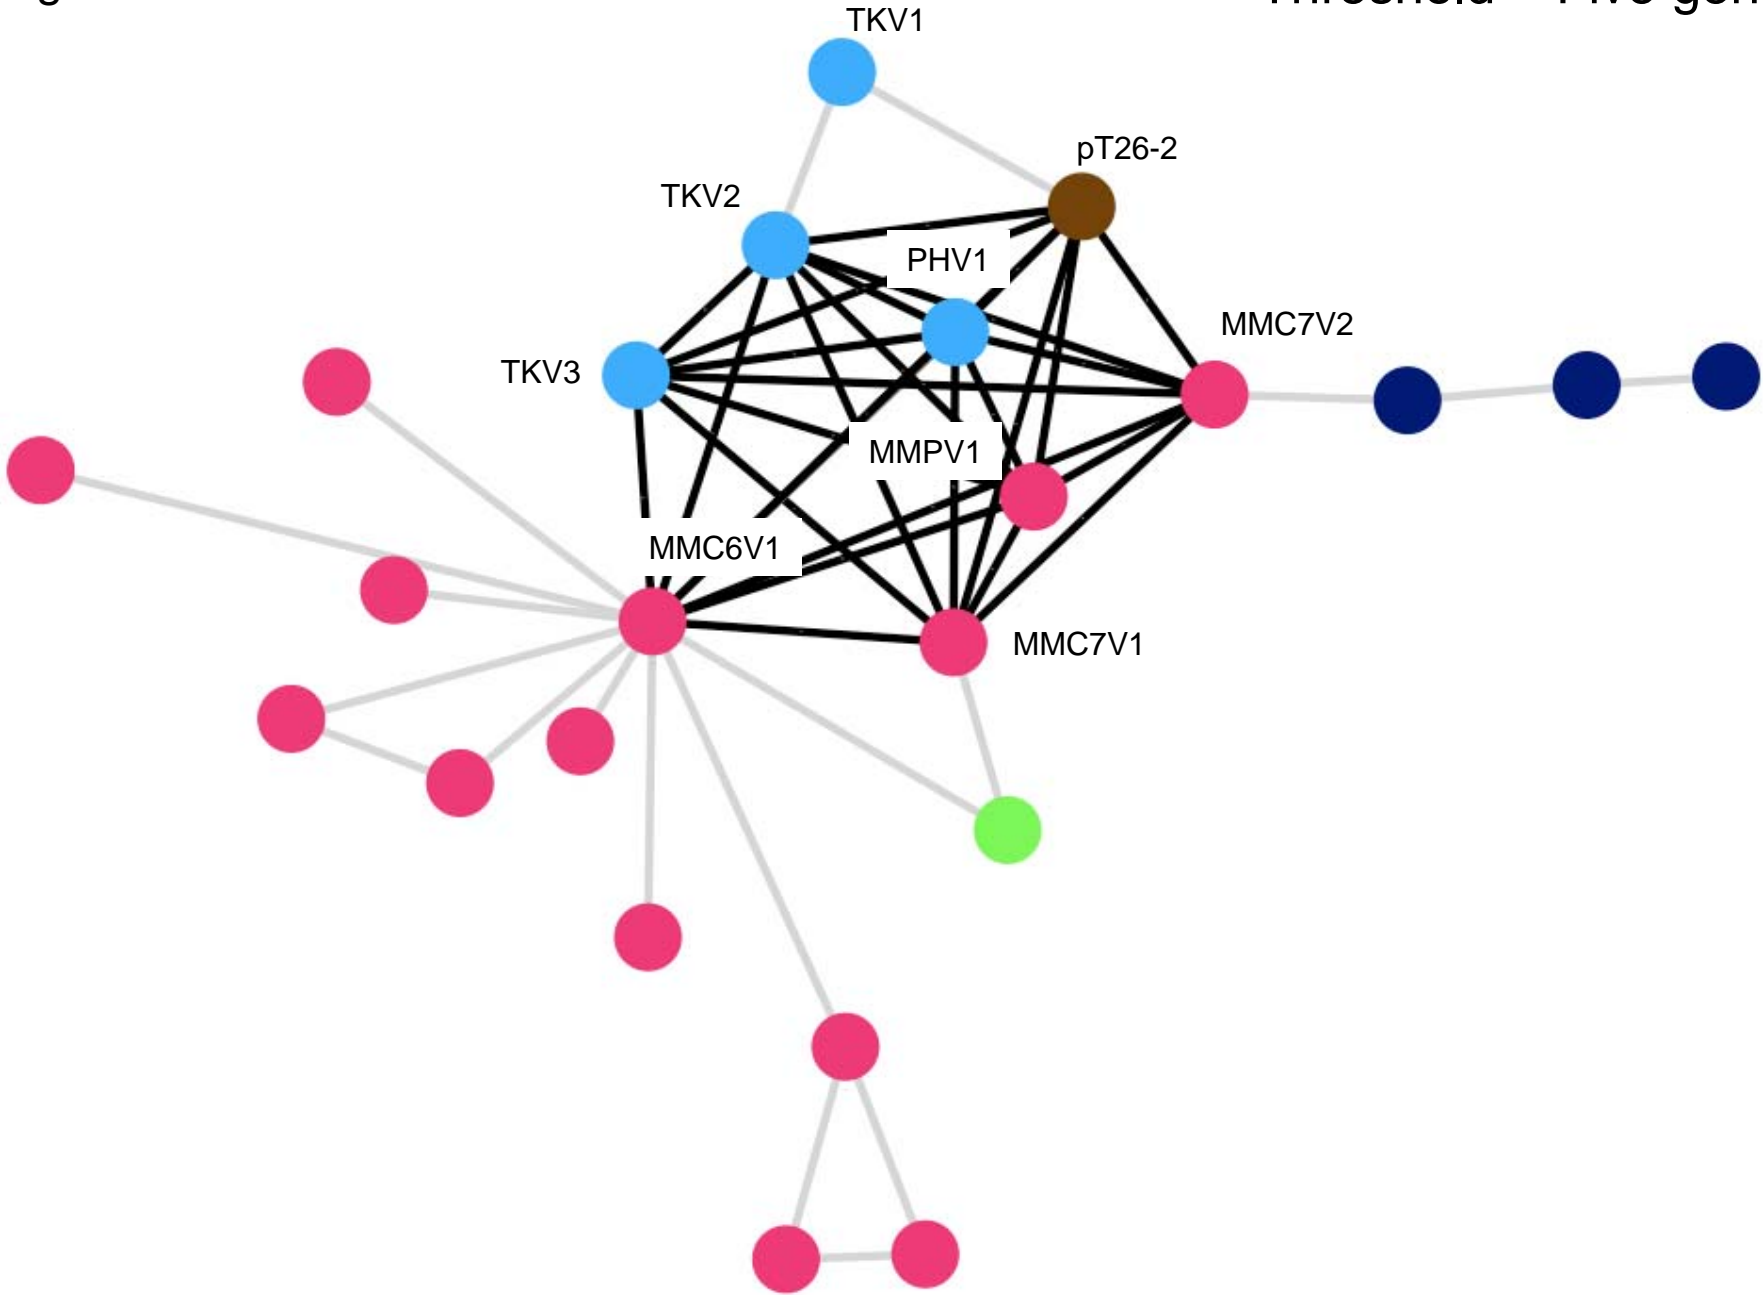

Figure S11C

Threshold = Four genes

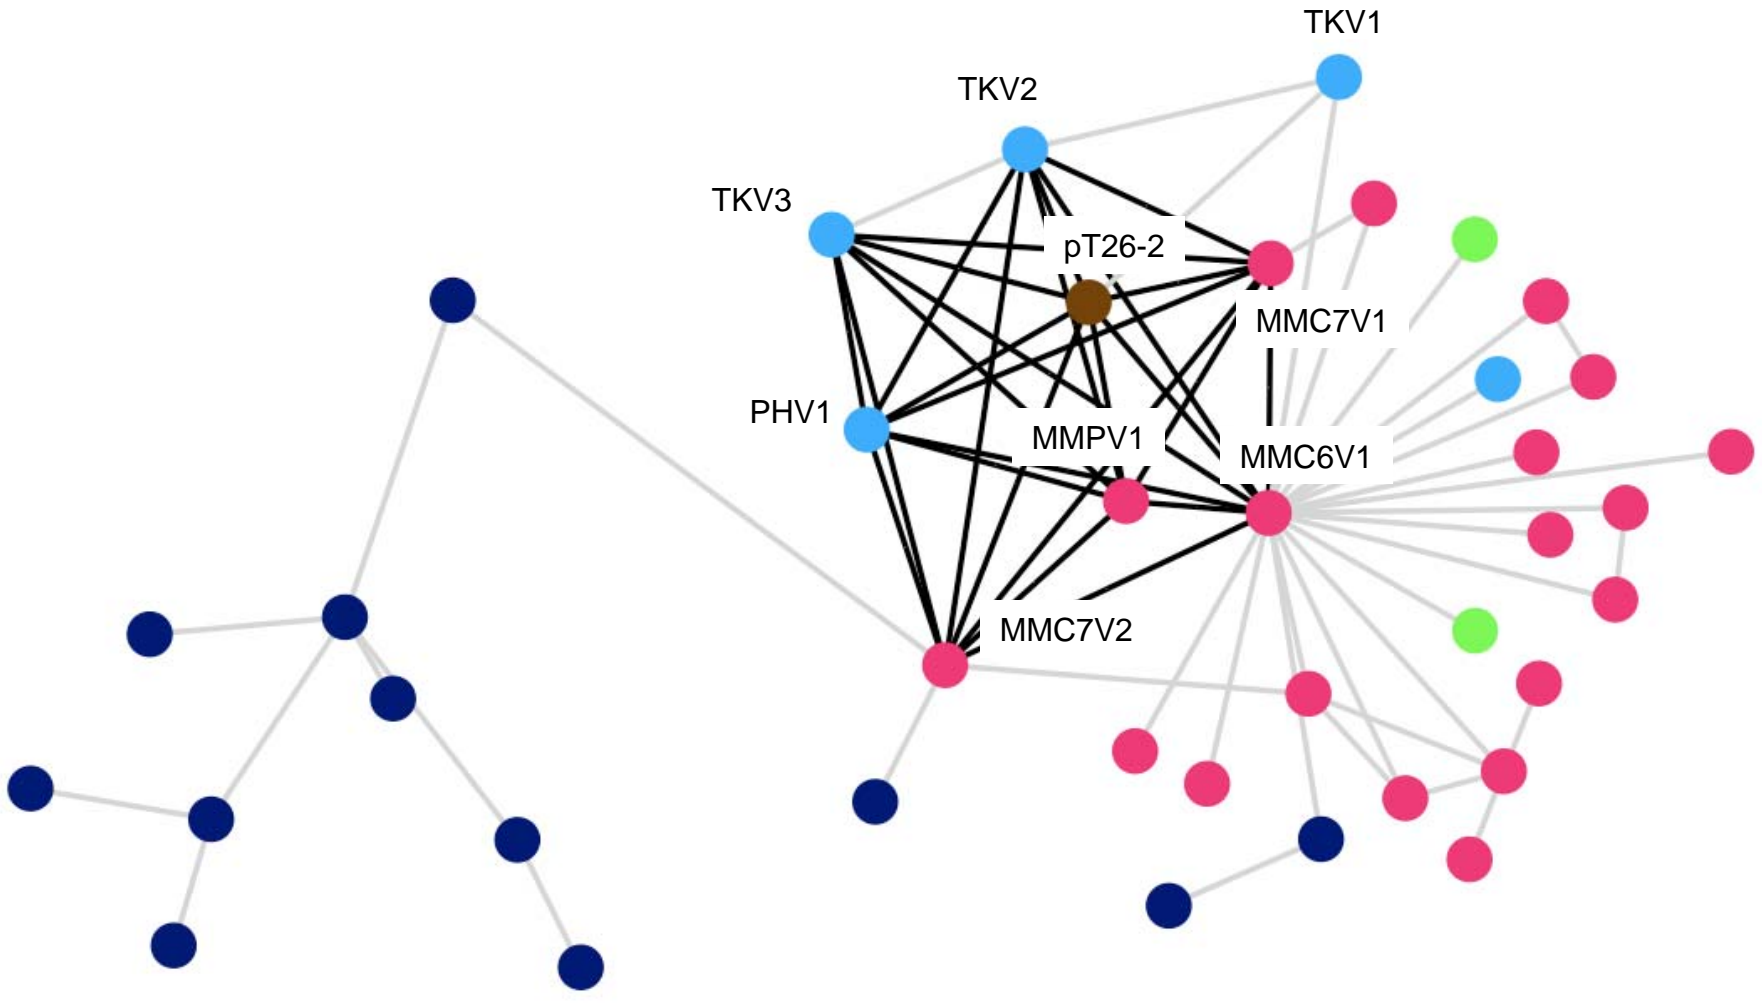

Figure S11D

Threshold = Three genes

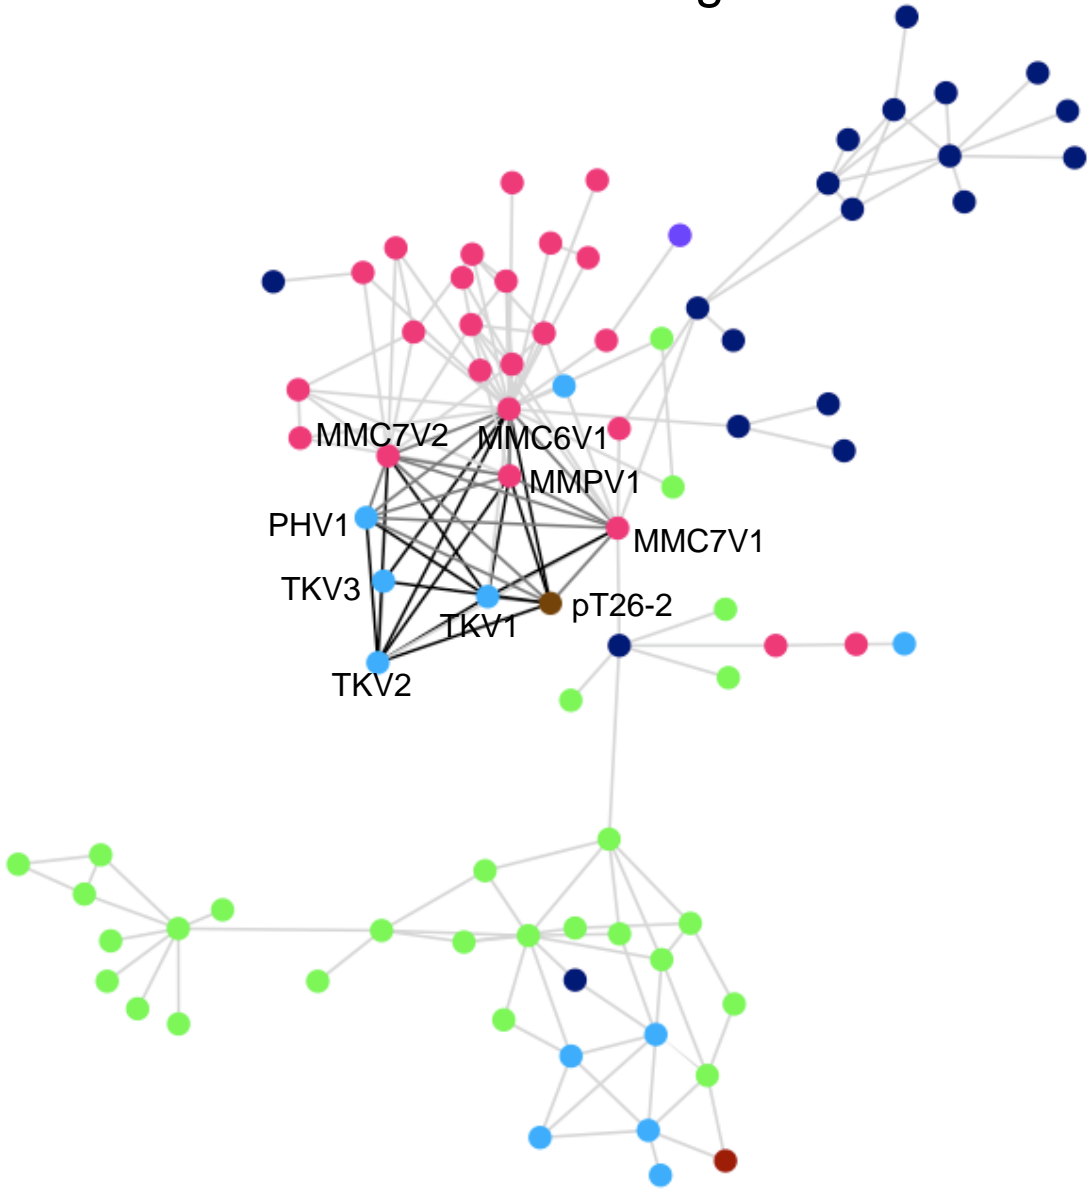

Figure S11E

Threshold = Two genes

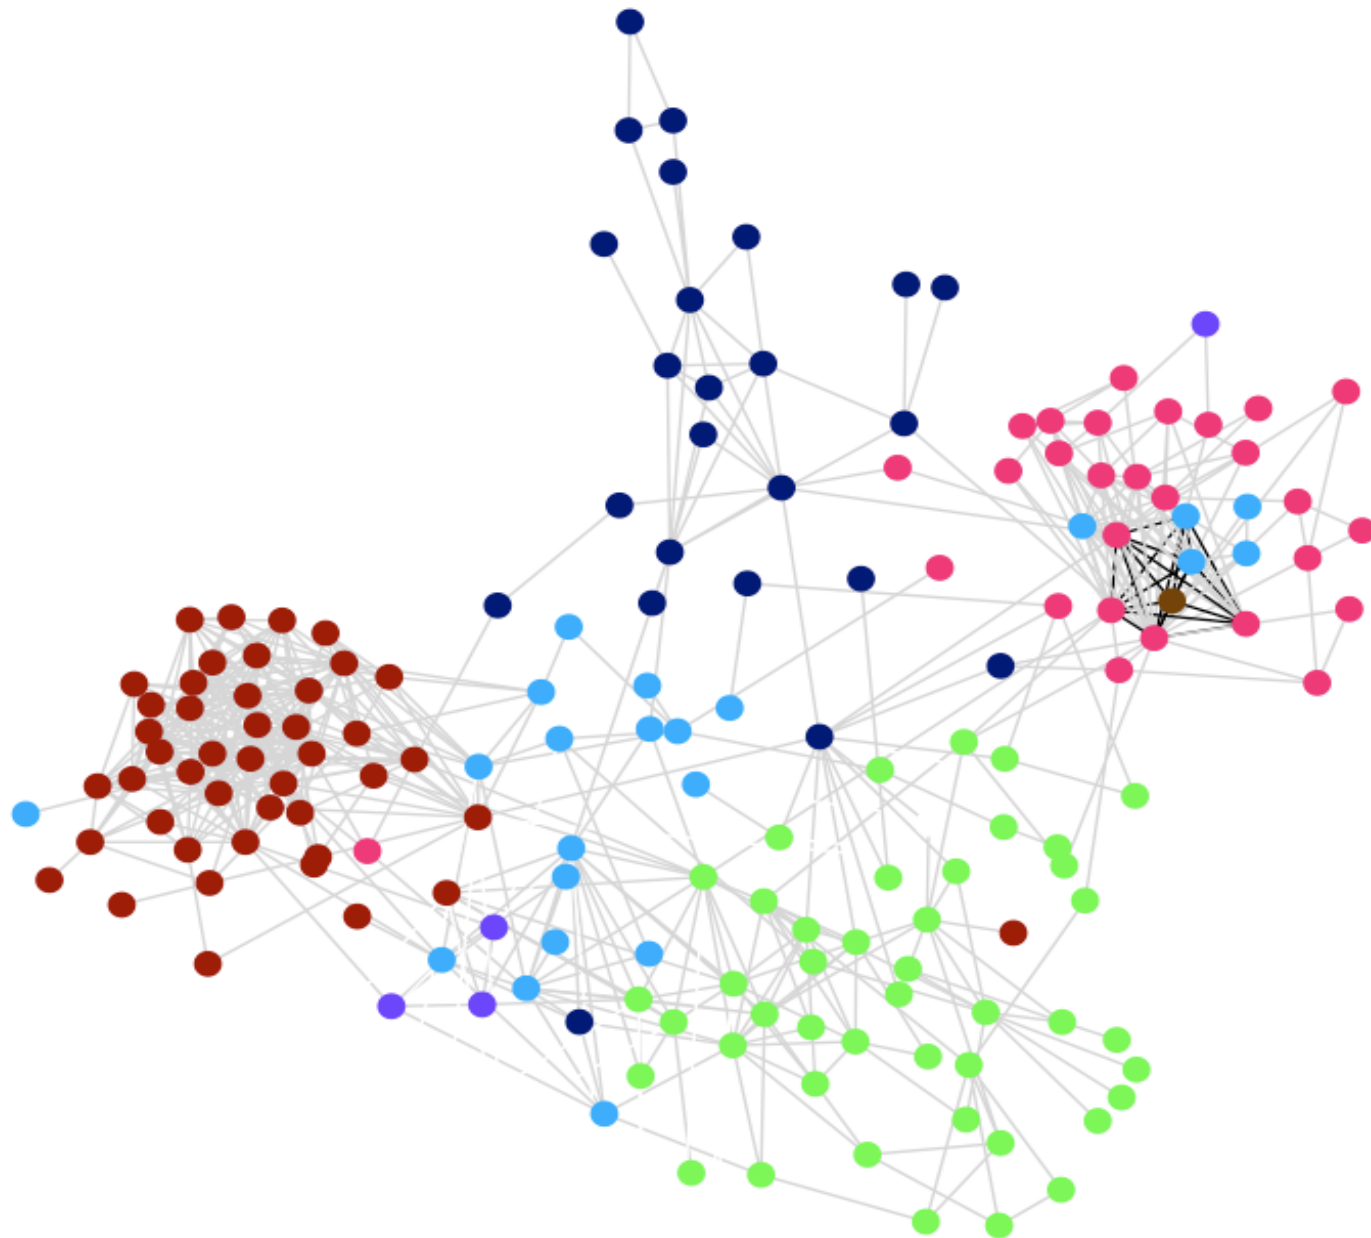

Figure S12

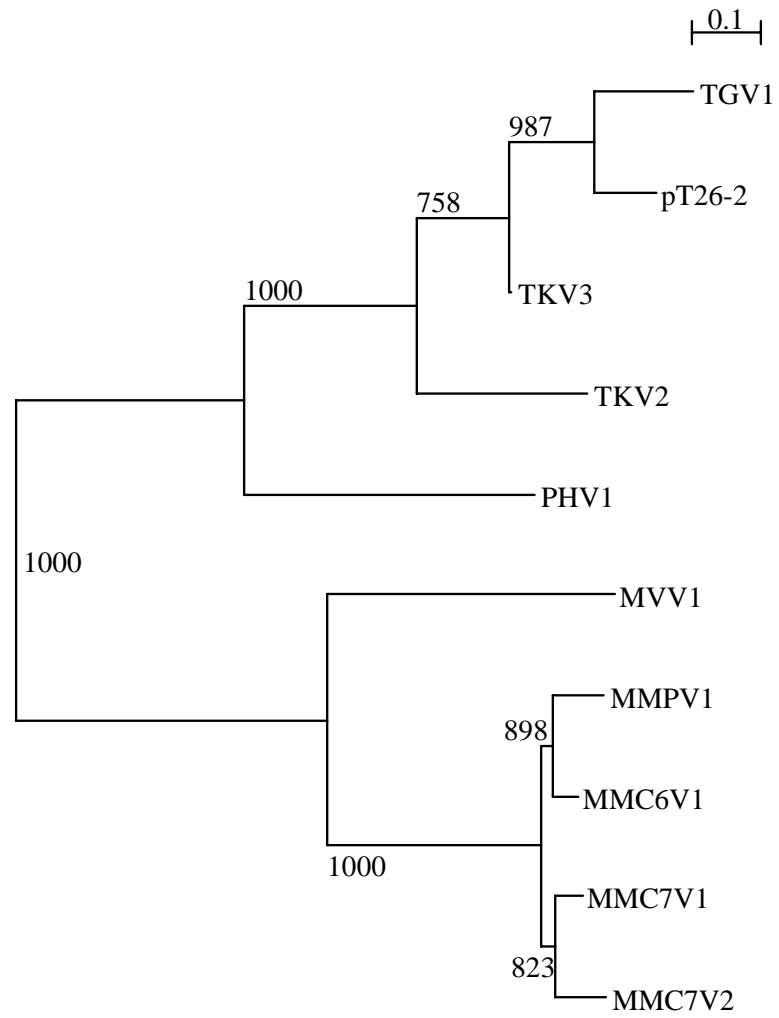

Figure S13

Rep pRN1 type

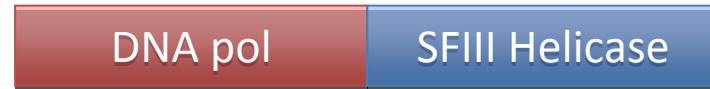

Rep pTAU4

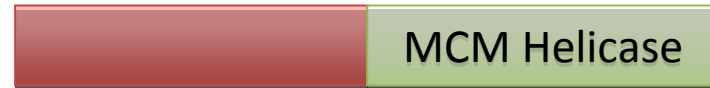

Rep pORA1, pIT3

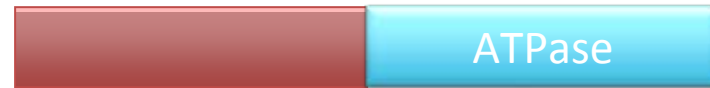

Rep pTN2, pP12-1, pXZ1, pTIK4

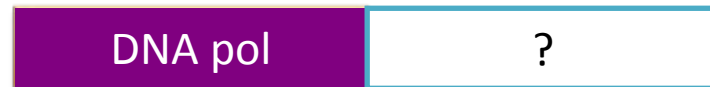

ATPase pT26-2

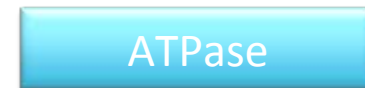

Rep *Methanococcus voltae* ORF1375

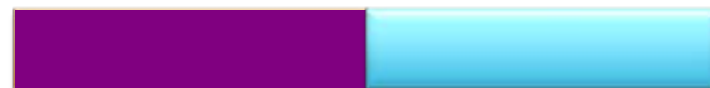

Supplement: gkq236_2.pdf [file gkq236_2.pdf]
