# Supplementary material for: Two novel families of plasmids from hyperthermophilic archaea encoding new families of replication proteins
Source: PubMed Central journal article supplement — Nucleic Acids Res. 2010 Apr 18;38(15):5088–104. doi: 10.1093/nar/gkq236 (PMC2926602; doi:10.1093/nar/gkq236), 2010-04-18
Supplement: gkq236_1.pdf [file gkq236_1.pdf]

Figure S3

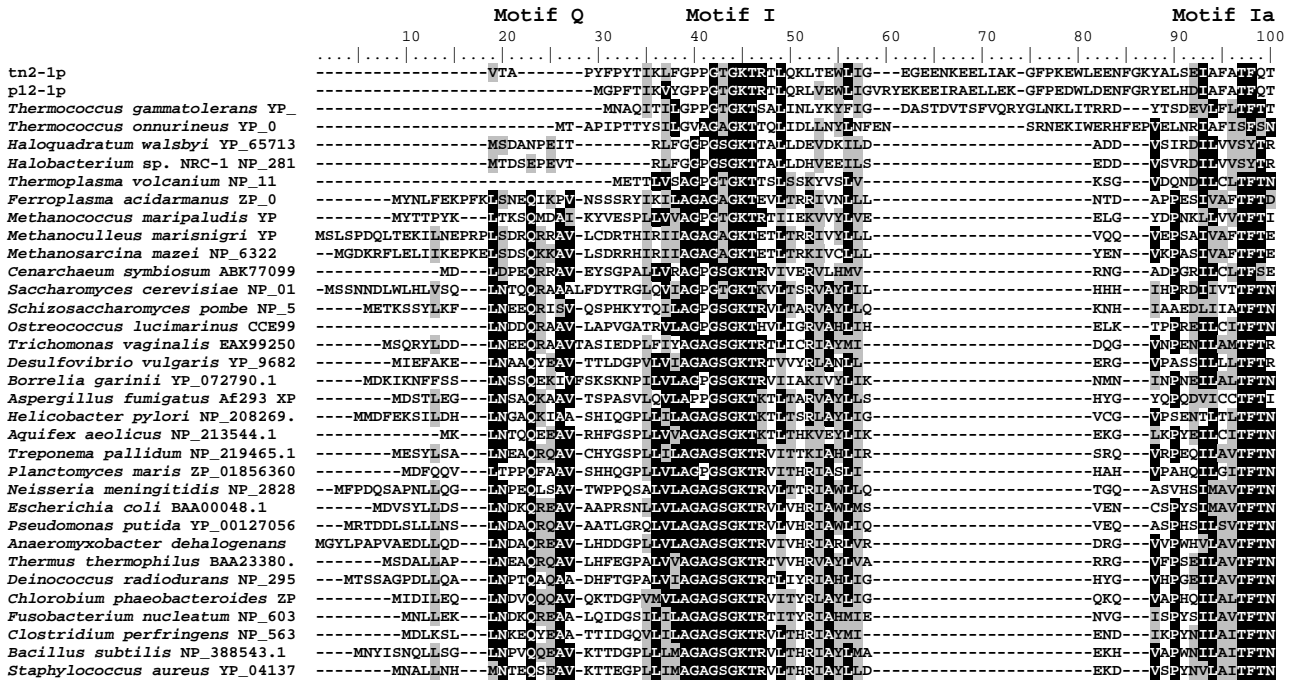

Motif Ia

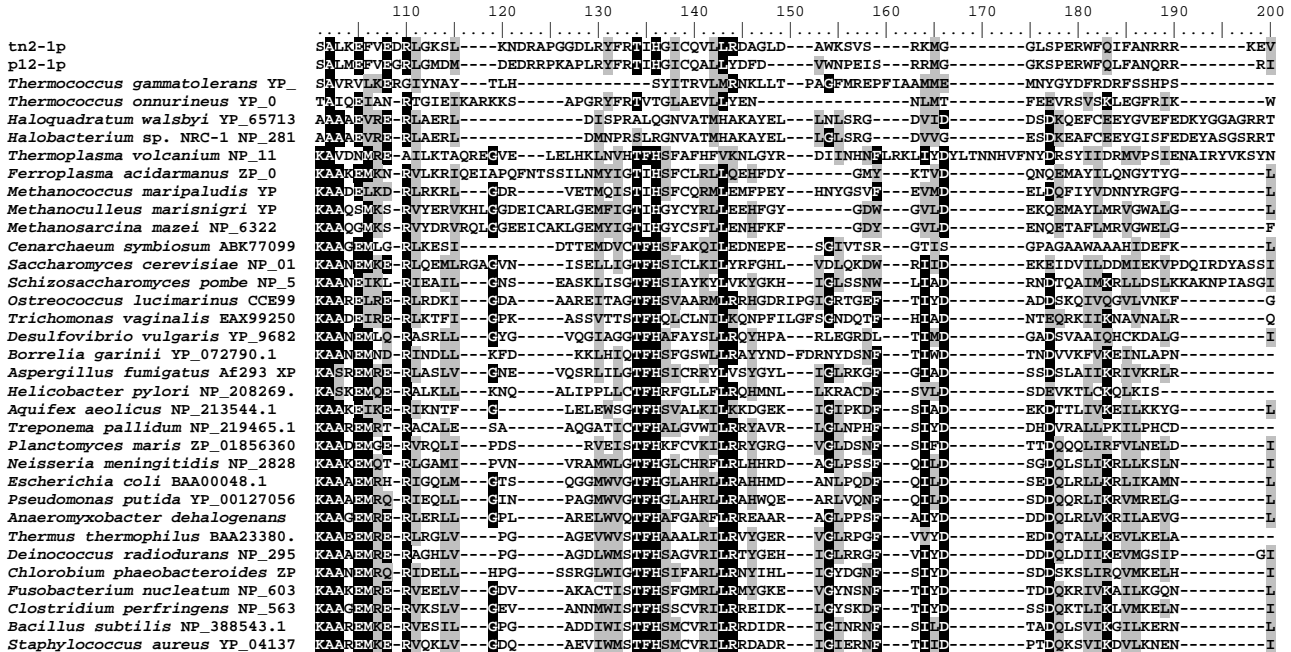

Motif II Motif III  
310 320 330 340 350 360 370 380 390 400  
tn2-1p IKVYDMDIDAYDAIKAGVISLPT---RVLVDFEODLSPLQFEIFKMLAR---DKELVVVIAQDDMOTHTFMGAD---PRFLVNYPA---  
p12-1p IVDVMDMDGQYDKSGVHILPT---KVLIVDFEODLSPLQFEIFKMLAK---DKELVVVIAQDDMOTHTFMGAD---PRFLVNYPA---  
Thermococcus gammatolerans YP\_0 IFDQVSVRYFLTT-TPATLAPKKGSEPRVMIIDBAQDFSPLOAVVVKRLRS---IGLLDYVVAAGDPNOSTYSFGADPSEF-ENFMAS---  
Thermococcus onnurineus YP\_0 IVDYEDDMRAYDY---RNDIVVQL---EYMLVDEADONSLIDVATLLPIAK---NNATELVLAGDDAQIYDFRGANYKLF-HKLIIERS---  
Haloquadratum walsbyi YP\_65713 LVGFADMLERV---KQSLVQV---DYLVDDEODITTSLOYDVVEKWRSS---SVDRLVLAGDDQVVIYAWGADPRLLL-LDANR---  
Halobacterium sp. NRC-1 NP\_281 LVGFADMLERV---EQSSLQV---EYMLVDEODITTSLOYDVVEEWRSS---HMDRVLVLAGDDQVVIYAWGADPRLLL-LDITTV---  
Thermoplasma volcanium NP\_11 VFDYDMLIKFINLSEK------PHYKVLVDELDQVSDLEAKTAGSVAR------NITYAVGDKKOSTFGQSGFR---SDTISNFFN---  
Ferropasma acidarmanus ZP\_0 IISFSQLIYFAVNIKKNKEKISNI---KYLIVDEYODINKVQVDFLLKQIGE---NASIFAQDPPROSTIYGRGANVYKVF-EESSNDFSN---  
Methanococcus maripaludis YP\_0 KLDFAMLQKQFYHMLNNEADALSVMREMFYLVDEYODTNPIODAIRLHAE---PKFNITVWGDPEOSTIYGRGANVYKVF-RQFLERYSGPEKI---  
Methanoculleus marisnigri YP\_0 RLTFNRMVQLAVENLQHRPEVAEHV---KYLIVDEYODINHAODELIRLIGL---GKSFVWGDPRROSTIYGRGSDQYVF-EEETTRYFE---  
Methanosarcina mazei NP\_6322 RLTFNRMNLALNTLQEKQNVLSDV---KYLIVDEYODINRAOKEKLTQIIGL---NSEIFTVWGDPRROSTIYGRGSDQYVF-EDFAVKHID---  
Cenarchaeum symbiosum ABK77099 IIDFDMDVSEAVRFRARDDVRSYGGYSHHVEVDQDANYAOLELVRLIAG---NITAVGDENOSTIYGCAGYTSGF-ENDDITGG---  
Saccharomyces cerevisiae NP\_01 TDYFDLLMYTFRLTRVRVLSNI---KHVLVDEODTNGIQLDLMFLEAK---GNHLSRGMITVGDPEOSTIYGFRLALAHNF-LEMGRKCKH---  
Schizosaccharomyces pombe NP\_5 LADFDLLLNFLILLOKQPCVNRNI---KHVLVDEODTNGIQLDLMFLEAK---GNHLSRGMITVGDPEOSTIYGFRLALAHNF-LEMGRKCKH---  
Ostreococcus lucimarinus CCE99 AFDFDILLSTAVMCEMCPDVRYSYHHRWQVLDVDEODTNSVQELRLKLSQ---PQGSVFWGDADQIYGRGANVYKVF-EDDFDKFD---  
Trichomonas vaginalis EAX99250 LIDDFDMFTYQELLLKHQRVAKYRKLQYVHLDFEODTNSDINEALIKLILQOSMTRQPPNRRVITVGDPEOSTIYGRGANVYKVF-KQLEMFDPD---  
Desulfovibrio vulgaris YP\_9682 LLDYDILLFEVERLRRERPDLLAHLRDRYRFTVDEYODTNLVQARLVOLLAG---EGGNVMAVGDADQIYGRGANVYKVF-PSPOFFDQ---  
Borrelia garinii YP\_072790.1 AFDFADLLIKPILMLRHSKSLKESVQSKFVHLVDEYODTNSVQELRLKLSQ---DGMVFWVGDPEOSTIYGRGANVYKVF-EEPEKTFDN---  
Aspergillus fumigatus Af293 XP LIDYDILLRRCADLRRHPQCVSNV---QAVLVDEODTNGIQLDLMFLEAK---GNHLSRGMITVGDPEOSTIYGFRLALAHNF-LEMGRKCKH---  
Helicobacter pylori NP\_208269.1 LVDFDILLFLSILKILQDNETIYAKETSERYRFTVDEYODTNGIQLDLMFLEAK---GNHLSRGMITVGDPEOSTIYGFRLALAHNF-LEMGRKCKH---  
Aquifex aeolicus NP\_213544.1 LIDFSDMLRRELYNLLV-VDEVREKYRNTFYRYLVDEYODTNGIQLDLMFLEAK---GNHLSRGMITVGDPEOSTIYGFRLALAHNF-LEMGRKCKH---  
Treponema pallidum NP\_219465.1 TVDFDILLMLFVQLRHEQDQVQLHQRWQVVMVDEYODTNSVQELRLKLSQ---PQGSVFWGDADQIYGRGANVYKVF-EDDFDKFD---  
Planctomyces maris ZP\_01856360 AVDFDILLLHVASLLKGSPELRAITLDERYQYLVDEYODTNSVQELRLKLSQ---PQGSVFWGDADQIYGRGANVYKVF-EDDFDKFD---  
Neisseria meningitidis NP\_2828 VDFDAILRSLRYEMLQSNELLRHHYQNRFNHHLVDEYODTNGIQLDLMFLEAK---GNHLSRGMITVGDPEOSTIYGFRLALAHNF-LEMGRKCKH---  
Escherichia coli BAA00048.1 LVDFDILLRRAHELWLNKPHILQHYRERFTNLVDEYODTNGIQLDLMFLEAK---GNHLSRGMITVGDPEOSTIYGFRLALAHNF-LEMGRKCKH---  
Pseudomonas putida YP\_00127056 VDFDAILRRAHELWLNKPHILQHYRERFTNLVDEYODTNGIQLDLMFLEAK---GNHLSRGMITVGDPEOSTIYGFRLALAHNF-LEMGRKCKH---  
Anaeromyxobacter dehalogenans AVDFDILLRPRVRLREDAALRARQAGRFYRYLVDEYODTNSVQELRLKLSQ---PQGSVFWGDADQIYGRGANVYKVF-EDDFDKFD---  
Thermus thermophilus BAA23380.1 AVDFDILLRRAHELWLNKPHILQHYRERFTNLVDEYODTNGIQLDLMFLEAK---GNHLSRGMITVGDPEOSTIYGFRLALAHNF-LEMGRKCKH---  
Deinococcus radiodurans NP\_295 AVDFDILLRRAHELWLNKPHILQHYRERFTNLVDEYODTNGIQLDLMFLEAK---GNHLSRGMITVGDPEOSTIYGFRLALAHNF-LEMGRKCKH---  
Chlorobium phaeoacteroides ZP AVDFDILLRRAHELWLNKPHILQHYRERFTNLVDEYODTNGIQLDLMFLEAK---GNHLSRGMITVGDPEOSTIYGFRLALAHNF-LEMGRKCKH---  
Fusobacterium nucleatum NP\_603 AVDFDILLRRAHELWLNKPHILQHYRERFTNLVDEYODTNGIQLDLMFLEAK---GNHLSRGMITVGDPEOSTIYGFRLALAHNF-LEMGRKCKH---  
Clostridium perfringens NP\_563 AVDFDILLRRAHELWLNKPHILQHYRERFTNLVDEYODTNGIQLDLMFLEAK---GNHLSRGMITVGDPEOSTIYGFRLALAHNF-LEMGRKCKH---  
Bacillus subtilis NP\_388543.1 AVDFDILLRRAHELWLNKPHILQHYRERFTNLVDEYODTNGIQLDLMFLEAK---GNHLSRGMITVGDPEOSTIYGFRLALAHNF-LEMGRKCKH---  
Staphylococcus aureus YP\_04137 AVDFDILLRRAHELWLNKPHILQHYRERFTNLVDEYODTNGIQLDLMFLEAK---GNHLSRGMITVGDPEOSTIYGFRLALAHNF-LEMGRKCKH---

Motif IV  
410 420 430 440 450 460 470 480 490 500  
tn2-1p -DLQILRKTWRLEPEKILREALYIAKANL---RSGVPEMVSTGKRGAGIIVSNFSTKNDNDLIDLLA-RWVLNLEKR-CH---SVVLEARI-NRQALH  
p12-1p -GLVIVRKTWRLEPEKILREALYIAKANL---RSGVPEMVSTGKRGAGIIVSNFSTKNDNDLIDLLA-RWVLNLEKR-CH---SVVLEARI-NRQALH  
Thermococcus gammatolerans YP\_0 -DTEVIVRKTWRLEPEKILREALYIAKANL---RSGVPEMVSTGKRGAGIIVSNFSTKNDNDLIDLLA-RWVLNLEKR-CH---SVVLEARI-NRQALH  
Thermococcus onnurineus YP\_0 -ETIILNLETFRFSGEIANIATAITDDMN---YIQ-KREVLSAATHSTKVAHIDLF---QMSM---HLQNMAT---TDLTVMVIAARI-NAVINY  
Haloquadratum walsbyi YP\_65713 -DEDVIVPNSYRLPSKVLSPVQOEIRHID---KRO-BRDHPKRGQGGTV---EGHS-PSML-DLARNVHRVTERSDGETLMTFRA-RYQMFQ  
Halobacterium sp. NRC-1 NP\_281 -TDDQVVPNSYRLPSKVLSPVQOEIRHID---KRO-BRDHPKRGQGGTV---EGHS-PSML-DLARNVHRVTERSDGETLMTFRA-RYQMFQ  
Thermoplasma volcanium NP\_11 -HQLKYLLEDHRNGKATIKYAKFEFKKST---KGGDEDELEKLTSSVRDHDGYVEVIEG-SY---SDHLVLDLR---FRGSGVGHARI-NAQVIN  
Ferropasma acidarmanus ZP\_0 -ABEFTLNEVRRSTKSNVNIENITVQKFP---DNPQYDPMVPREKSGDVIAEYENASREA-EGIA-NKIKCEIKL-DK---KYSKFAVILRSVNTSGDL  
Methanococcus maripaludis YP\_0 KAHMKLEBENRRSPEELVDAFDKFMGPHR---TF-EKIKLISKNQHSYSDPVLVSESPEES-IKIA-EMHEKLIITKHV---DYGDIAVLEKSVRHNANE  
Methanoculleus marisnigri YP\_0 -AVTTHITEVNRRTVAVIETANGVSDTFE---DQH-YDHDPVREQGGAYLAEMQSDITEV-DWIA-DQIQALVRE-EK-CSYSDIALRFSVSTAPP  
Methanosarcina mazei NP\_6322 -AETTSINENRRSGRQITEVSNQSDYFE---DE-YDHPVKEEGAVYIAKLSDNHIA-KWIA-DQHEKHVDA-CK-CSYGDIGITLRSVNTSAPP  
Cenarchaeum symbiosum ABK77099 -AETTSINNNYRCKTKTAGLAQCANTP---S---GSAQAVHPGEGSPVEIVECAEDSE-ACIA-DRIVQIRSP-GGESAGYSIAVITRK-TADGKK  
Saccharomyces cerevisiae NP\_01 EYSTIILVNYRSOKIILNTSEILITQON-KGRON-RAPRAQFDLDFPPVYMNFPAYFLA-PSLV-RELLYLKAL-PNLFTFNDPAIVRQ-RRLKLR  
Schizosaccharomyces pombe NP\_5 -TQVHLBERNYRSAPFIEALSISQDK---SRP-KGCKSNHISLKPHYRLFTNNKES-YWIA-REIKRIVGSCPELIFYNDIAIVRS-SSLHRS  
Ostreococcus lucimarinus CCE99 -QVQHTMLTNYRSTATVIAQAQVAKESA---FPS-PLDVMANTPGCRDVAIVANDRDEA-EFIA-LEARKSKE-DEPDLRYSEAVIYVRI-NSQARV  
Trichomonas vaginalis EAX99250 -AGHVTLISKNYRSCSIVKASQSIKDFG---N---ETEISMIPIGCPKFIASADAYEA-DSIC-TEITRYVYP-GSIIQYRDICTERM-KKVAE  
Desulfovibrio vulgaris YP\_9682 -TRIKLEBENYRSTOPIVLDLTAALAEAP---QAY-RHEVYTSREDOVLPQVVRPLSDLOA-SIVV-SRVSELLRT---YPPHEAVIYRA-GFHSYH  
Borrelia garinii YP\_072790.1 -VIKPYLVQNYRSNNTVSTANGVLSKNN---NRV-BKQITONGSGKRMKFLVQSTSDA-EYFS---NLLVA-ND---LETAILMRF-NSQSFH  
Aspergillus fumigatus Af293 XP -TSVILLEDNYRSGSILRSDQVHEQDS---SRP-SRKQPTHCPGMPVLRKLPATAEAE-QWIV-LEIKRSMAMTKLLNYSDFPAILLRS-AATSRH  
Helicobacter pylori NP\_208269.1 -AKIVKLEBENYRSTOPIVLDLTAALAEAP---QAY-RHEVYTSREDOVLPQVVRPLSDLOA-SIVV-SRVSELLRT---YPPHEAVIYRA-GFHSYH  
Aquifex aeolicus NP\_213544.1 -PKIILKLEBENYRSTOPIVLDLTAALAEAP---QAY-RHEVYTSREDOVLPQVVRPLSDLOA-SIVV-SRVSELLRT---YPPHEAVIYRA-GFHSYH  
Treponema pallidum NP\_219465.1 -TQIIRLEBENYRSTOPIVLDLTAALAEAP---QAY-RHEVYTSREDOVLPQVVRPLSDLOA-SIVV-SRVSELLRT---YPPHEAVIYRA-GFHSYH  
Planctomyces maris ZP\_01856360 -CKTIRLEBENYRSTOPIVLDLTAALAEAP---QAY-RHEVYTSREDOVLPQVVRPLSDLOA-SIVV-SRVSELLRT---YPPHEAVIYRA-GFHSYH  
Neisseria meningitidis NP\_2828 -DAPVKLEBENYRSTOPIVLDLTAALAEAP---QAY-RHEVYTSREDOVLPQVVRPLSDLOA-SIVV-SRVSELLRT---YPPHEAVIYRA-GFHSYH  
Escherichia coli BAA00048.1 -AETIRLEBENYRSTOPIVLDLTAALAEAP---QAY-RHEVYTSREDOVLPQVVRPLSDLOA-SIVV-SRVSELLRT---YPPHEAVIYRA-GFHSYH  
Pseudomonas putida YP\_00127056 -AEMIRLEBENYRSTOPIVLDLTAALAEAP---QAY-RHEVYTSREDOVLPQVVRPLSDLOA-SIVV-SRVSELLRT---YPPHEAVIYRA-GFHSYH  
Anaeromyxobacter dehalogenans -AKVYKLEBENYRSTOPIVLDLTAALAEAP---QAY-RHEVYTSREDOVLPQVVRPLSDLOA-SIVV-SRVSELLRT---YPPHEAVIYRA-GFHSYH  
Thermus thermophilus BAA23380.1 -ARVYKLEBENYRSTOPIVLDLTAALAEAP---QAY-RHEVYTSREDOVLPQVVRPLSDLOA-SIVV-SRVSELLRT---YPPHEAVIYRA-GFHSYH  
Deinococcus radiodurans NP\_295 -AKVYKLEBENYRSTOPIVLDLTAALAEAP---QAY-RHEVYTSREDOVLPQVVRPLSDLOA-SIVV-SRVSELLRT---YPPHEAVIYRA-GFHSYH  
Chlorobium phaeoacteroides ZP -VSAFKVLEBENYRSTOPIVLDLTAALAEAP---QAY-RHEVYTSREDOVLPQVVRPLSDLOA-SIVV-SRVSELLRT---YPPHEAVIYRA-GFHSYH  
Fusobacterium nucleatum NP\_603 -AKVYKLEBENYRSTOPIVLDLTAALAEAP---QAY-RHEVYTSREDOVLPQVVRPLSDLOA-SIVV-SRVSELLRT---YPPHEAVIYRA-GFHSYH  
Clostridium perfringens NP\_563 -AKVYKLEBENYRSTOPIVLDLTAALAEAP---QAY-RHEVYTSREDOVLPQVVRPLSDLOA-SIVV-SRVSELLRT---YPPHEAVIYRA-GFHSYH  
Bacillus subtilis NP\_388543.1 -ASVILLEDNYRSTOPIVLDLTAALAEAP---QAY-RHEVYTSREDOVLPQVVRPLSDLOA-SIVV-SRVSELLRT---YPPHEAVIYRA-GFHSYH  
Staphylococcus aureus YP\_04137 -ANTIFLEBENYRSTOPIVLDLTAALAEAP---QAY-RHEVYTSREDOVLPQVVRPLSDLOA-SIVV-SRVSELLRT---YPPHEAVIYRA-GFHSYH

Motif V

|                                        |                                                            |       |                                            |       |        |         |       |         |                   |                 |         |          |          |          |     |
|----------------------------------------|------------------------------------------------------------|-------|--------------------------------------------|-------|--------|---------|-------|---------|-------------------|-----------------|---------|----------|----------|----------|-----|
|                                        | 710                                                        | 720   | 730                                        | 740   | 750    | 760     | 770   | 780     | 790               | 800             |         |          |          |          |     |
| tn2-1p                                 | ARRFLKELTK                                                 | ----- | -----                                      | ----- | EGITP  | LAGTPE  | ----- | -----   | DHELYVD           | TIHSSKGL        | EAD     |          |          |          |     |
| p12-1p                                 | ARRFLKELTK                                                 | ----- | -----                                      | ----- | EGLRPM | DGTPE   | ----- | -----   | EHELYVD           | TIHASKGR        | EAD     |          |          |          |     |
| <i>Thermococcus gammatolerans</i> YP_  | DVLSLARFTE                                                 | ----- | NHYLDVLDPEEK                               | ----- | RVLGR  | RKRKR   | ----- | -----   | GRATVYD           | TIHAAKGR        | EAD     |          |          |          |     |
| <i>Thermococcus onnurineus</i> YP_0    | DVLGI                                                      | ----- | LLLAYEQTTAK                                | ----- | RLLT   | TAKTNF  | ----- | -----   | KIKLST            | TIHSAKGR        | EAD     |          |          |          |     |
| <i>Haloquadratum walsbyi</i> YP_65713  | -TAAAGDMLR                                                 | ----- | KVTSFORK                                   | ----- | SVEAY  | FDG     | ----- | DYGGMD  | FSRIRV            | TIHSAKGR        | EAD     |          |          |          |     |
| <i>Halobacterium</i> sp. NRC-1 NP_281  | -PSAADMRLR                                                 | ----- | KVTRVQR                                    | ----- | SIDAY  | FEQ     | ----- | DYRGM   | PDRVVR            | TIHSAKGR        | EAD     |          |          |          |     |
| <i>Thermoplasma volcanium</i> NP_11    | ISYMLQEVLY                                                 | ----- | MYGINDRQ                                   | ----- | DLNLY  | EVCDQ   | ----- | ELTESSN | TERISV            | TIHSAKGR        | EAD     |          |          |          |     |
| <i>Ferroplasma acidarmanus</i> ZP_0    | ILANIGRFTK                                                 | ----- | VLGDVEQSVRYGGGNKNIQKEMK                    | ----- | PLCW   | ENTYAN  | ----- | HSYQEA  | KIEDLSK           | -----           | DNVVTV  | TIHSSKGL | EAD      |          |     |
| <i>Methanococcus maripaludis</i> YP    | QLKNGAKFTT                                                 | ----- | ILEKFKKNT                                  | ----- | GSNS   | SKSFY   | ----- | -----   | LTKIPDNKLEDAASPEG | -----           | QDVVKMT | TIHSAKGR | EAD      |          |     |
| <i>Methanoculleus marisnigri</i> YP    | IMANLGRFNT                                                 | ----- | LLTDYETAIMLGGRRRNWETDLK                    | ----- | GLCW   | ENTYAS  | ----- | SKYEEQ  | TGDDIGG           | -----           | VDVAV   | TIHSSKGL | EAD      |          |     |
| <i>Methanosarcina mazei</i> NP_6322    | IMANLGRFSS                                                 | ----- | LLTDFESANMLGGRRRNWERDLK                    | ----- | NLCW   | YMNYSAS | ----- | GSYEEQ  | PGDDIRG           | -----           | VDVAV   | TIHSSKGL | EAD      |          |     |
| <i>Cenarchaeum symbiosum</i> ABK77099  | GAEHLRBAQR                                                 | ----- | LATEYDLLDPRGGLD                            | ----- | GLVGY  | WAANS   | ----- | DKNLR   | SDADA             | -----           | GGAVE   | TIHSAKGR | EAD      |          |     |
| <i>Saccharomyces cerevisiae</i> NP_01  | RKHNIETLKNYFLALLSKSESSDKKEKNEAIKATDEAEPIENKVITPKVYLRNFENLS | ----- | -----                                      | ----- | -----  | -----   | ----- | -----   | HSDAAREE          | SESENKDAKIKREKN | SVTIS   | TIHSAKGR | EAD      |          |     |
| <i>Schizosaccharomyces pombe</i> NP_5  | WENVMELVQ                                                  | ----- | QSDNISCFIVELDYKISTIV                       | ----- | TLQNF  | TQIAL   | ----- | -----   | VNEEQKEG          | -----           | SQKVTIS | TIHSAKGR | EAD      |          |     |
| <i>Ostreococcus lucimarinus</i> CCE99  | RWAFVQELIN                                                 | ----- | LAKEPQDIDETIQDRVGL                         | ----- | ALGSE  | LEGISL  | ----- | -----   | LTSAESKEEG        | -----           | GDTVK   | TIHSAKGR | EAD      |          |     |
| <i>Trichomonas vaginalis</i> EAX99250  | FSEAQQDMIN                                                 | ----- | DRNETFQLLLLEESKRFRHRLLAANEGTPLLSSQK        | ----- | CLQRF  | IDSIT   | ----- | -----   | ETTSNM            | -----           | KNAV    | TIHSAKGR | EAD      |          |     |
| <i>Desulfovibrio vulgaris</i> YP_9682  | ROQGLEOVQ                                                  | ----- | IASAYR                                     | ----- | DDDF   | ESDLS   | ----- | -----   | EDPGTEED          | -----           | RDSV    | TIHSAKGR | EAD      |          |     |
| <i>Borrelia garinii</i> YP_072790.1    | KLRNDELIN                                                  | ----- | SGLEYSGTFE                                 | ----- | GLAF   | ENSSL   | ----- | -----   | SPLISGDF          | -----           | KSNP    | TIHSAKGR | EAD      |          |     |
| <i>Aspergillus fumigatus</i> Af293 XP  | RWANVEFLA                                                  | ----- | QAGDVAAFAAEKQDDSLPEIQGLAQQAHQGEEALSQFLANVA | ----- | -----  | -----   | ----- | -----   | STEV              | SEDDQP          | -----   | QEKVTIS  | TIHSAKGR | EAD      |     |
| <i>Helicobacter pylori</i> NP_208269.1 | REGFKVETL                                                  | ----- | LVKEYFKINPTH                               | ----- | SLDF   | ENESV   | ----- | -----   | DAHTEN            | -----           | AQKV    | TIHSAKGR | EAD      |          |     |
| <i>Aquifex aeolicus</i> NP_213544.1    | RLENVKEFLS                                                 | ----- | SLKDFYKAY                                  | ----- | TIED   | LAETI   | ----- | -----   | TSEEEE            | -----           | ENAV    | TIHSAKGR | EAD      |          |     |
| <i>Treponema pallidum</i> NP_219465.1  | CAVNVQELMN                                                 | ----- | AASLACASHE                                 | ----- | GVVS   | LEHIQ   | ----- | -----   | DQNADEGA          | -----           | ADAV    | TIHSAKGR | EAD      |          |     |
| <i>Planctomyces maris</i> ZP_01856360  | RLANVNEFLS                                                 | ----- | TAKKYDDIYGEET                              | ----- | TLGG   | LEVST   | ----- | -----   | ASATDQLTD         | -----           | AGRV    | TIHSAKGR | EAD      |          |     |
| <i>Neisseria meningitidis</i> NP_2828  | RLDNDELIN                                                  | ----- | AAIEFKPEDSNFETLDPNISDDPAP                  | ----- | PLAF   | SNAA    | ----- | -----   | ESGENQAGAG        | -----           | EKAV    | TIHSAKGR | EAD      |          |     |
| <i>Escherichia coli</i> BAA00048.1     | RLENVEFLV                                                  | ----- | ATRFQSYNEDEEDLM                            | ----- | PLQAF  | SHAAL   | ----- | -----   | EAGEGQADTW        | -----           | QDAV    | TIHSAKGR | EAD      |          |     |
| <i>Pseudomonas putida</i> YP_00127056  | RVENLEFLVS                                                 | ----- | AARNFESDEEDADLS                            | ----- | PLSA   | FCHASL  | ----- | -----   | EAGDTQADEH        | -----           | EDSI    | TIHSAKGR | EAD      |          |     |
| <i>Anaeromyxobacter dehalogenans</i>   | RAENLAELVA                                                 | ----- | AAAREDESIGEPFPPGDPVVRPP                    | ----- | PLAR   | EQIAL   | ----- | -----   | LGEADAATP         | -----           | EGRV    | TIHSAKGR | EAD      |          |     |
| <i>Thermus thermophilus</i> BAA23380.1 | RLENVEFLDR                                                 | ----- | AAKEAE                                     | ----- | PLQDF  | DRVAL   | ----- | -----   | TAKAEPEAA         | -----           | EGRV    | TIHSAKGR | EAD      |          |     |
| <i>Deinococcus radiodurans</i> NP_295  | RLENVEFLVS                                                 | ----- | AAEENSQDEANVGG                             | ----- | SIAD   | PDDAAL  | ----- | -----   | SSVDDMR           | TKAENK          | GAP     | -----    | EDAV     | TIHSAKGR | EAD |
| <i>Chlorobium phaeobacteroides</i> ZP  | RHENVEFLS                                                  | ----- | MARDESHPNPEAN                              | ----- | SIDEF  | ANGIS   | ----- | -----   | ATDYNEVQES        | -----           | DNV     | TIHSAKGR | EAD      |          |     |
| <i>Fusobacterium nucleatum</i> NP_603  | RLENVEFLKN                                                 | ----- | SILELENVQEL                                | ----- | RLEN   | LENVSI  | ----- | -----   | ISATDNLEEK        | -----           | SDYV    | TIHSAKGR | EAD      |          |     |
| <i>Clostridium perfringens</i> NP_563  | RLENVEFLVS                                                 | ----- | DAVEFEKSNEEDK                              | ----- | SI     | SAVLEK  | ----- | -----   | VQMDMLEAE         | -----           | DNV     | TIHSAKGR | EAD      |          |     |
| <i>Bacillus subtilis</i> NP_388543.1   | RLENVEFLS                                                  | ----- | VTKNFEQKSEDK                               | ----- | TLVA   | FETDLA  | ----- | -----   | LADIDQLDQKEEESG   | -----           | KDAT    | TIHSAKGR | EAD      |          |     |
| <i>Staphylococcus aureus</i> YP_04137  | RLENVEFLMS                                                 | ----- | VPKDYEENTPLEEQ                             | ----- | SLIN   | FETDLS  | ----- | -----   | VADIDEADT         | -----           | ENSV    | TIHSAKGR | EAD      |          |     |

|                                        |                         |       |       |          |         |       |                    |       |        |        |        |          |                    |
|----------------------------------------|-------------------------|-------|-------|----------|---------|-------|--------------------|-------|--------|--------|--------|----------|--------------------|
|                                        | 810                     | 820   | 830   | 840      | 850     | 860   | 870                | 880   | 890    | 900    |        |          |                    |
| tn2-1p                                 | TVFLINEMPRRN            | ----- | ----- | RRYFKRPE | -----   | D     | -----              | LEAE  | ARVWF  | GMTRAK | GLLINT |          |                    |
| p12-1p                                 | TVFLINEMPRRN            | ----- | ----- | WRRFF    | -----   | RSEEE | -----              | LEAE  | ARVWF  | GMTRAK | GLIVMT |          |                    |
| <i>Thermococcus gammatolerans</i> YP_  | TVFLIVDFVNRKI           | ----- | ----- | EKEIK    | -----   | RDENA | -----              | LEEE  | RRVLYV | AMTRAK | RYVLT  |          |                    |
| <i>Thermococcus onnurineus</i> YP_0    | TVFLINSV                | ----- | PHK   | -----    | KMKILEN | ----- | -----              | LEEE  | RRVLYV | AMTRAK | RYVLDQ |          |                    |
| <i>Haloquadratum walsbyi</i> YP_65713  | HVFVATDLTEKVV           | ----- | EQM   | -----    | AA      | SVDES | AVPGVDEFTARTDPVPIL | ----- | TDNE   | RRVLYV | GMTRAK | RYVLEN   |                    |
| <i>Halobacterium</i> sp. NRC-1 NP_281  | HVFVATDLTEKVV           | ----- | EQM   | -----    | AA      | TADPE | TPVDVEFTSKTSPVPIL  | ----- | TDNE   | RRVLYV | GMTRAK | RYVLDQ   |                    |
| <i>Thermoplasma volcanium</i> NP_11    | HVFVLPKTRDNE            | ----- | SVVDL | CAYELIRE | -----   | ----- | -----              | ----- | LEED   | TRVDF  | VALTRP | VHLLITD  |                    |
| <i>Ferroplasma acidarmanus</i> ZP_0    | TVFLPSIINKRE            | ----- | BSL   | THKSNL   | -----   | ----- | -----              | ----- | LDSE   | RRVLYV | AMTRAK | NYCLMSNF |                    |
| <i>Methanococcus maripaludis</i> YP    | VVFLGCVTERRYGARADDRLVNI | ----- | PKQ   | -----    | FMMNK   | HVD   | -----              | ----- | FDSE   | RRVLYV | GMTRAK | LLTISA   |                    |
| <i>Thermoplasma marisnigri</i> YP      | LVFVPCMVQRRE            | ----- | SSM   | VGKTR    | -----   | ----- | -----              | ----- | LESE   | RRVLYV | AMTRAK | RYVVSF   |                    |
| <i>Methanosarcina mazei</i> NP_6322    | LVFVPAMNARRE            | ----- | SSM   | AGREQ    | -----   | ----- | -----              | ----- | LESE   | RRVLYV | AMTRAK | RYVVSF   |                    |
| <i>Cenarchaeum symbiosum</i> ABK77099  | AVFVADAVDRRLPKYKGRKYQV  | ----- | TTLL  | HGRRP    | -----   | ----- | -----              | ----- | MOBE   | RRVLYV | AMTRAK | NYCLITYS |                    |
| <i>Saccharomyces cerevisiae</i> NP_01  | VVFLPQCEGGII            | ----- | PCV   | FNDK     | -----   | ----- | -----              | ----- | LEDE   | RRM    | RYV    | AMTRAK   | RYVLSNTVTVEDVDRPRI |
| <i>Schizosaccharomyces pombe</i> NP_5  | VVFLPCLCNLII            | ----- | PHS   | -----    | RSDD    | ----- | -----              | ----- | LEDE   | RRVLYV | AMTRAK | RYVLSV   |                    |
| <i>Ostreococcus lucimarinus</i> CCE99  | SVFLSVEEGGLI            | ----- | PFV   | -----    | -----   | ----- | -----              | ----- | QDEE   | RRVLYV | AMTRAK | RYVLSHA  |                    |
| <i>Trichomonas vaginalis</i> EAX99250  | VCFIMRFNSQIL            | ----- | PMA   | -----    | -----   | ----- | -----              | ----- | LENE   | RRVLYV | AMTRAK | RYVLSHA  |                    |
| <i>Desulfovibrio vulgaris</i> YP_9682  | AVTLLDLVDRRE            | ----- | PSR   | -----    | -----   | ----- | -----              | ----- | LEEE   | RRVLYV | AMTRAK | RYVLSHA  |                    |
| <i>Borrelia garinii</i> YP_072790.1    | RVVLSLEKGLL             | ----- | PAE   | -----    | -----   | ----- | -----              | ----- | LEEE   | RRVLYV | AMTRAK | RYVLSHA  |                    |
| <i>Aspergillus fumigatus</i> Af293 XP  | VVFLPAVYNGII            | ----- | PHS   | -----    | RAEDS   | ----- | -----              | ----- | LEEE   | RRVLYV | AMTRAK | RYVLSHA  |                    |
| <i>Helicobacter pylori</i> NP_208269.1 | HVFVIGDEEGFE            | ----- | PH    | -----    | RGFNQ   | ----- | -----              | ----- | LEEE   | RRVLYV | AMTRAK | RYVLSHA  |                    |
| <i>Aquifex aeolicus</i> NP_213544.1    | VVFLPRLEEGIL            | ----- | PHH   | -----    | RSQES   | ----- | -----              | ----- | LEEE   | RRVLYV | AMTRAK | RYVLSHA  |                    |
| <i>Treponema pallidum</i> NP_219465.1  | RVLITGLENGVE            | ----- | BRD   | -----    | -----   | ----- | -----              | ----- | TOEE   | RRVLYV | AMTRAK | RYVLSHA  |                    |
| <i>Planctomyces maris</i> ZP_01856360  | VVFLVQVEONLI            | ----- | PHE   | -----    | RVLRE   | ----- | -----              | ----- | LEEE   | RRVLYV | AMTRAK | RYVLSHA  |                    |
| <i>Neisseria meningitidis</i> NP_2828  | AVFLTCMEGRF             | ----- | PSE   | -----    | MSLAE   | ----- | -----              | ----- | LEEE   | RRVLYV | AMTRAK | RYVLSHA  |                    |
| <i>Escherichia coli</i> BAA00048.1     | VVFLVQVEEGRF            | ----- | PSQ   | -----    | MSLDE   | ----- | -----              | ----- | LEEE   | RRVLYV | AMTRAK | RYVLSHA  |                    |
| <i>Pseudomonas putida</i> YP_00127056  | VVFLVQVEEGLE            | ----- | PHK   | -----    | MSLEE   | ----- | -----              | ----- | LEEE   | RRVLYV | AMTRAK | RYVLSHA  |                    |
| <i>Anaeromyxobacter dehalogenans</i>   | AVFLAGMEGTL             | ----- | PVE   | -----    | RPWAD   | ----- | -----              | ----- | LEDE   | RRVLYV | AMTRAK | RYVLSHA  |                    |
| <i>Thermus thermophilus</i> BAA23380.1 | VVFLVQVEEGGLI           | ----- | PHR   | -----    | NSVST   | ----- | -----              | ----- | LEEE   | RRVLYV | AMTRAK | RYVLSHA  |                    |
| <i>Deinococcus radiodurans</i> NP_295  | VVFLVQVEEGLL            | ----- | PSK   | -----    | GATAEG  | ----- | -----              | ----- | LEEE   | RRVLYV | AMTRAK | RYVLSHA  |                    |
| <i>Chlorobium phaeobacteroides</i> ZP  | VVFLTCMEERLE            | ----- | P     | -----    | LNYYE   | ----- | -----              | ----- | LEEE   | RRVLYV | AMTRAK | RYVLSHA  |                    |
| <i>Fusobacterium nucleatum</i> NP_603  | VVFLVQVEENELF           | ----- | PJT   | -----    | RAMFD   | ----- | -----              | ----- | LEEE   | RRVLYV | AMTRAK | RYVLSHA  |                    |
| <i>Clostridium perfringens</i> NP_563  | VVFLVQVENGIF            | ----- | PNA   | -----    | ACFEH   | ----- | -----              | ----- | LEEE   | RRVLYV | AMTRAK | RYVLSHA  |                    |
| <i>Bacillus subtilis</i> NP_388543.1   | VVFLVQVEEGVF            | ----- | PHS   | -----    | RSLME   | ----- | -----              | ----- | LEEE   | RRVLYV | AMTRAK | RYVLSHA  |                    |
| <i>Staphylococcus aureus</i> YP_04137  | VVFLVQVEESLE            | ----- | PHI   | -----    | RAIKS   | ----- | -----              | ----- | MOBE   | RRVLYV | AMTRAK | RYVLSHA  |                    |

Figure S5

```

Rep-pXZ1      75 ANT--FFADDDFKEK-KDCKPGIYKDDP-----ETFELELCYEEGKTVYVHRPPLQELLRKL-EEVK--LTPVTFIIDSNGYQLLWKNKYPVEAEQWK
Rep-pTIK4    142 AKR--LFTDDDFKEKIKDPDGLKQKALNRECIIELEDHALDCYVLDGETVVHVRRPQLKELLOKIENELG--IKI-SGVNDSNGYHIFLELENEIDIKQWE
p12-17p     121 KYTLTLVVDIDV-----EEIHKSQVVESEKAFELAKRAWDELKPKL-EGIG--VNP-RYVFFETGGGVQL-WFVAPGLEPIEVI
tn2-12p     120 GFTLALVVDIDN-----TKIHDTRIIEEAEFEASKREWEALPKL-QELG--FIP-RWILYTGGLQL-WFVSDKLEPISVI
Mvo1DRAFT_1375 92 DNISILPIDIDVLKDLVNY-----GDPKKDEKFLKDI-T-KITDLEAHKLVEDYYKNLNLPKP-TFSFETGEGIQLYVLENSITEEELL
Mvo1DRAFT_0800 147 AWS-YIPIDFDI-----DEWK-DKEPTKEEMNQKINNI-FNKLPDDY-----TKP-HLIVFTGGGLRFIYYIDRPI SRLPLP
MJ_ECL28    161 AWS-YIAFDIDV-----EEWKTNKMPTEEIMEKLIKY-LSKFEVSD-----LIP-HKVAFTGGGLRFILYPERPILEEELI

```

```

Rep-pXZ1      164 KREEELR--TLQKAGLPAD-----PQVKDISRVLRLPGSINHRNGR-----EAKIHYVGETV----AVLPEK-YERIINA
Rep-pTIK4    239 KLENDFTK--ALQATGLEVD-----DAVKNPSRVLRRLPGSVNQRNGR-----RASVIYYN-----ENI
p12-17p     195 DRASRVLP--PVLNAMLPEG-----YSVDNIFDRARIVRVPLEINVKYKT-----PDERPLEIRGRLEFNDVR----TPLGE-----VLD
tn2-12p     194 DRASEILP---NIMNGVNGVKGLLSEGFKADNIFDPAKIVRAPLTFNKKYRTIIEKDEDGTERVVPTQVKGRVLEFNDVR----ISLTE-----FLD
Mvo1DRAFT_1375 176 KF-KKLHEFDNKNNYIVNCD-----SNLYDLARVLRPEFSDNKKYIS-----KKGRVLEINDVKYDYNVAVINQFKNVVNYKDN
Mvo1DRAFT_0800 215 IF-SKIAE---EIGHGAD-----SAMMDIARVDRLPGLKNNRKEY-----KSERNCILYIKNSL-----VPITPEVFIIFEGI
MJ_ECL28    230 LL-RMIAE---DL--GAD-----IAMMDIARVDRLPGLKNNRKEYGSPRRCVTTIAQLTDEEDIEKLLTPIILYEFKGIENYKEFEVLENE

```

Figure S6

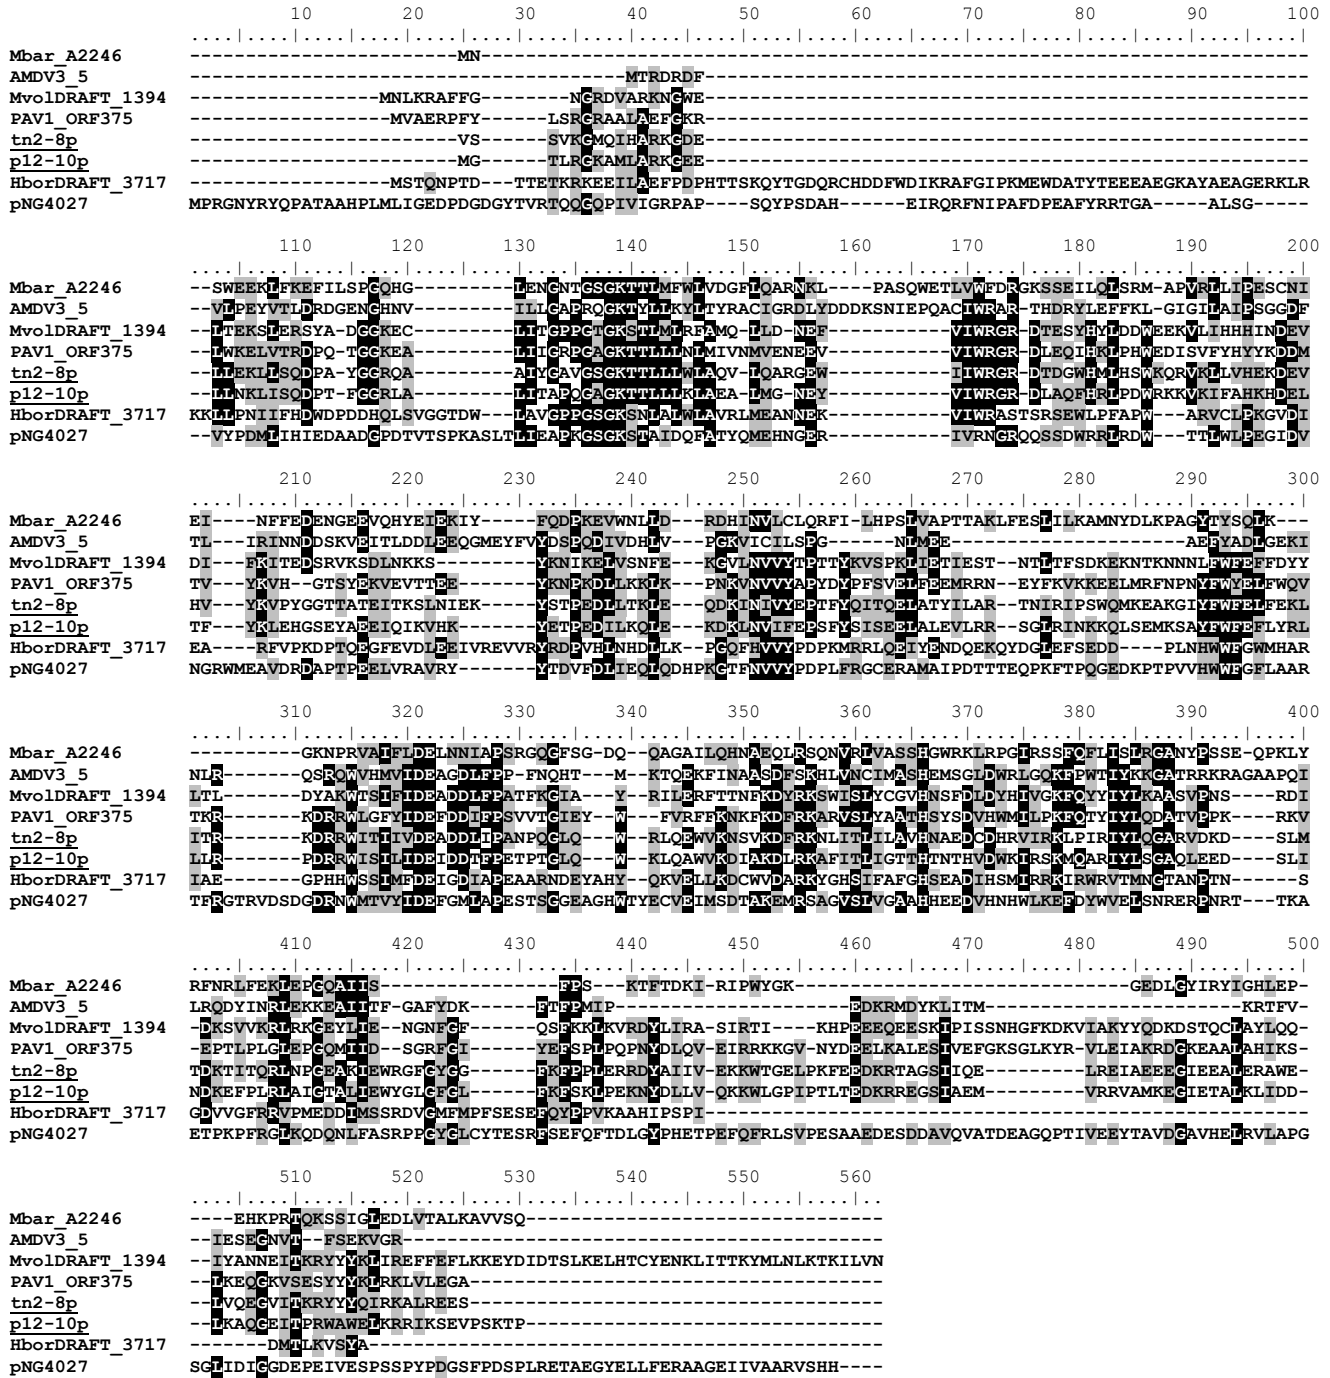

Figure S7

```

      10      20      30      40      50      60      70      80      90      100
PAV153  -MIRERLRKWLGTEDNASKLTDLKKELFLIKENLEN-----QISQI-----RAE--LETOLKDKVE--REELNBIILFRIDELEREVKLLKYSI
tn2-3   MSLKSRRLRAFLGLPEVEAEIRIKETLSKLSDALEDLQSKVDAODELKRRAITELSRKADMGLYEINERLETTRDEIKAMEAEISSIWDRVKVLEFSFS
p12-14  MGRSFTRRVI--LGDLEDEVRKLEDITLQISNRLEDLERRVEDQATQL--RNLYQV--KADKGLYYDLSERVEIAREELVLRREVDNIRSQILALEFSAS

      110      120      130      140      150      160      170
PAV153  LNARVGEISHEMLKQKILDILSTREEIITISELOSIVGCGKPKLYQLLKELEKEEKLRRKPKGRV--ILKPINPL
tn2-3   EHSEEPMTVEEL--ASIVEHYIRKGI--TRPSELKAVGVSWEKLYAALTYLKLKKRIARI--OKRRVVEYVLVEEAE
p12-14  EKSVSNEMSTEDL--ARMVEHYIROCVTRPSELQKIKGISWEKLYAVLDELAKKRI--ORT--KGRKTEYILVEEGD-
  
```

Figure S8

|            |       |                     |       |                   |       |                 |
|------------|-------|---------------------|-------|-------------------|-------|-----------------|
| Ec.Pol I   | (348) | KAPVFAFDTEITDSDNIS  | (417) | V-GQNL--KYDRGILA  | (492) | EEAGRVAEDADVIT  |
| Ec.Pol III | (6)   | TROIT-VLDTEITGMNQIG | (95)  | LVIHN-AA-FDIGFMD  | (147) | ALCARY-EIDNSKR  |
| Bs.Pol III | (419) | ETYV-VFDEVTGSAVY    | (502) | LVAHN-A-SFDMGFLN  | (553) | TLCKKF-DIELTQH  |
| SPO2       | (1)   | LKTL-SIDIEFFSSVDLL  | (70)  | KTAYN-AN-FERTCIA  | (161) | EKFVYCIQDVEVE   |
| T7         | (1)   | MIVSDIEANALLESV     | (57)  | V-FHNGH-KYDVPALT  | (165) | EEMMDYNVQDVVIT  |
| T4         | (182) | RVIYMPFDNRDMMEYI    | (210) | FTGWNII-EGFDVPYIM | (332) | DKIRGF--IDLVLIS |
| φ29        | (5)   | PAKMYSCDFEITTKVEDC  | (58)  | LIFHNL--KFDGAFII  | (193) | DSLKGF--KDIIT   |
| PRD1       | (10)  | EYKTAADFETDPPFKHDR  | (67)  | IYAHNG-GKFDLEFLM  | (177) | E-LKQFHPYDPVYK  |
| PolI-yeast | (433) | SFELDPDIPESDYLVLL   | (474) | VFGGNS-NIESEFVIQ  | (715) | DLSEMYQVCEKEKH  |
| α-human    | (606) | NVKVEVAATERT-LLGFF  | (635) | V-GHNI-YGFELEVLL  | (701) | IRCKSYHLSELVQQ  |
| p12-11p    | (41)  | EKEAV-LDLETTGLEPEW  | (130) | KDAINI--SEDDR-LS  | (175) | RELMLYYAWDFPKI  |

Figure S8 adapted from Bernad et al, Cell, 59(219-28), 1989 (ref 48). Sequences:

Ec.Pol I: *E. coli* DNA polymerase I. Ec. Pol III: *E. coli* DNA polymerase III ε subunit. Bs.Pol III: *Bacillus subtilis* DNA polymerase III. SPO2: phage SPO2 DNA polymerase. T7 and T4: phages T7 and T4 DNA polymerases. φ29: phage φ29 DNA polymerase. PRD1: phage PRD1 DNA polymerase. PolI-yeast: DNA polymerase I from *Saccharomyces cerevisiae*. α-human: Human DNA polymerase α.

Figure S9

```

      10      20      30      40      50      60      70      80      90      100
t26-18  -----MKRFKNT-----IVI-----IDRSTEHESTRGF-----TVLALVGVNDSEV
TK0597  -----MKRFKNT-----IVI-----IDRSTEHESTRGF-----TVLALVGVNDSEV
TraG protein [Pseudomonas aeru
TraG [Azotobacter vinelandii D
TraG [Xanthobacter autotrophic
TraG [Sphingomonas sp. SKA58]
TraG [Sphingomonas wittichii R
      110      120      130      140      150      160      170      180      190      200
t26-18  -----GPKRIVFRDLNLRKAKKHYGSAKAKAMMLKAA-----LKGER-----
TK0597  -----GPKRIVFRDLNLRKAKKHYGSAKAKAMMLKAA-----LKGER-----
TraG protein [Pseudomonas aeru
TraG [Azotobacter vinelandii D
TraG [Xanthobacter autotrophic
TraG [Sphingomonas sp. SKA58]
TraG [Sphingomonas wittichii R
      210      220      230      240      250      260      270      280      290      300
t26-18  -----
TK0597  -----
TraG protein [Pseudomonas aeru
TraG [Azotobacter vinelandii D
TraG [Xanthobacter autotrophic
TraG [Sphingomonas sp. SKA58]
TraG [Sphingomonas wittichii R
      310      320      330      340      350      360      370      380      390      400
t26-18  -----TALADHTYFICHYRHPITGKLRK-----DLPQRFY-----DDEQLVDCCKFLGDKDVI
TK0597  -----TNLTSHLHEIRVYRISVIGKIRDR-----DLPQRFY-----DDEQLVDCCKFLGDKDII
TraG protein [Pseudomonas aeru
TraG [Azotobacter vinelandii D
TraG [Xanthobacter autotrophic
TraG [Sphingomonas sp. SKA58]
TraG [Sphingomonas wittichii R
      410      420      430      440      450      460      470      480      490      500
t26-18  -----SILKRRYFDLKTIEKESKTTARQYKHMVLVFNIAFYFRTIAVLENDPESLE-----LIRK-----GF
TK0597  -----SILKRRYFDLKTIEKESKTTARQYKHMVLVFNIAFYFRTIAVLENDPESLE-----LIRK-----GF
TraG protein [Pseudomonas aeru
TraG [Azotobacter vinelandii D
TraG [Xanthobacter autotrophic
TraG [Sphingomonas sp. SKA58]
TraG [Sphingomonas wittichii R
  
```

Figure S10

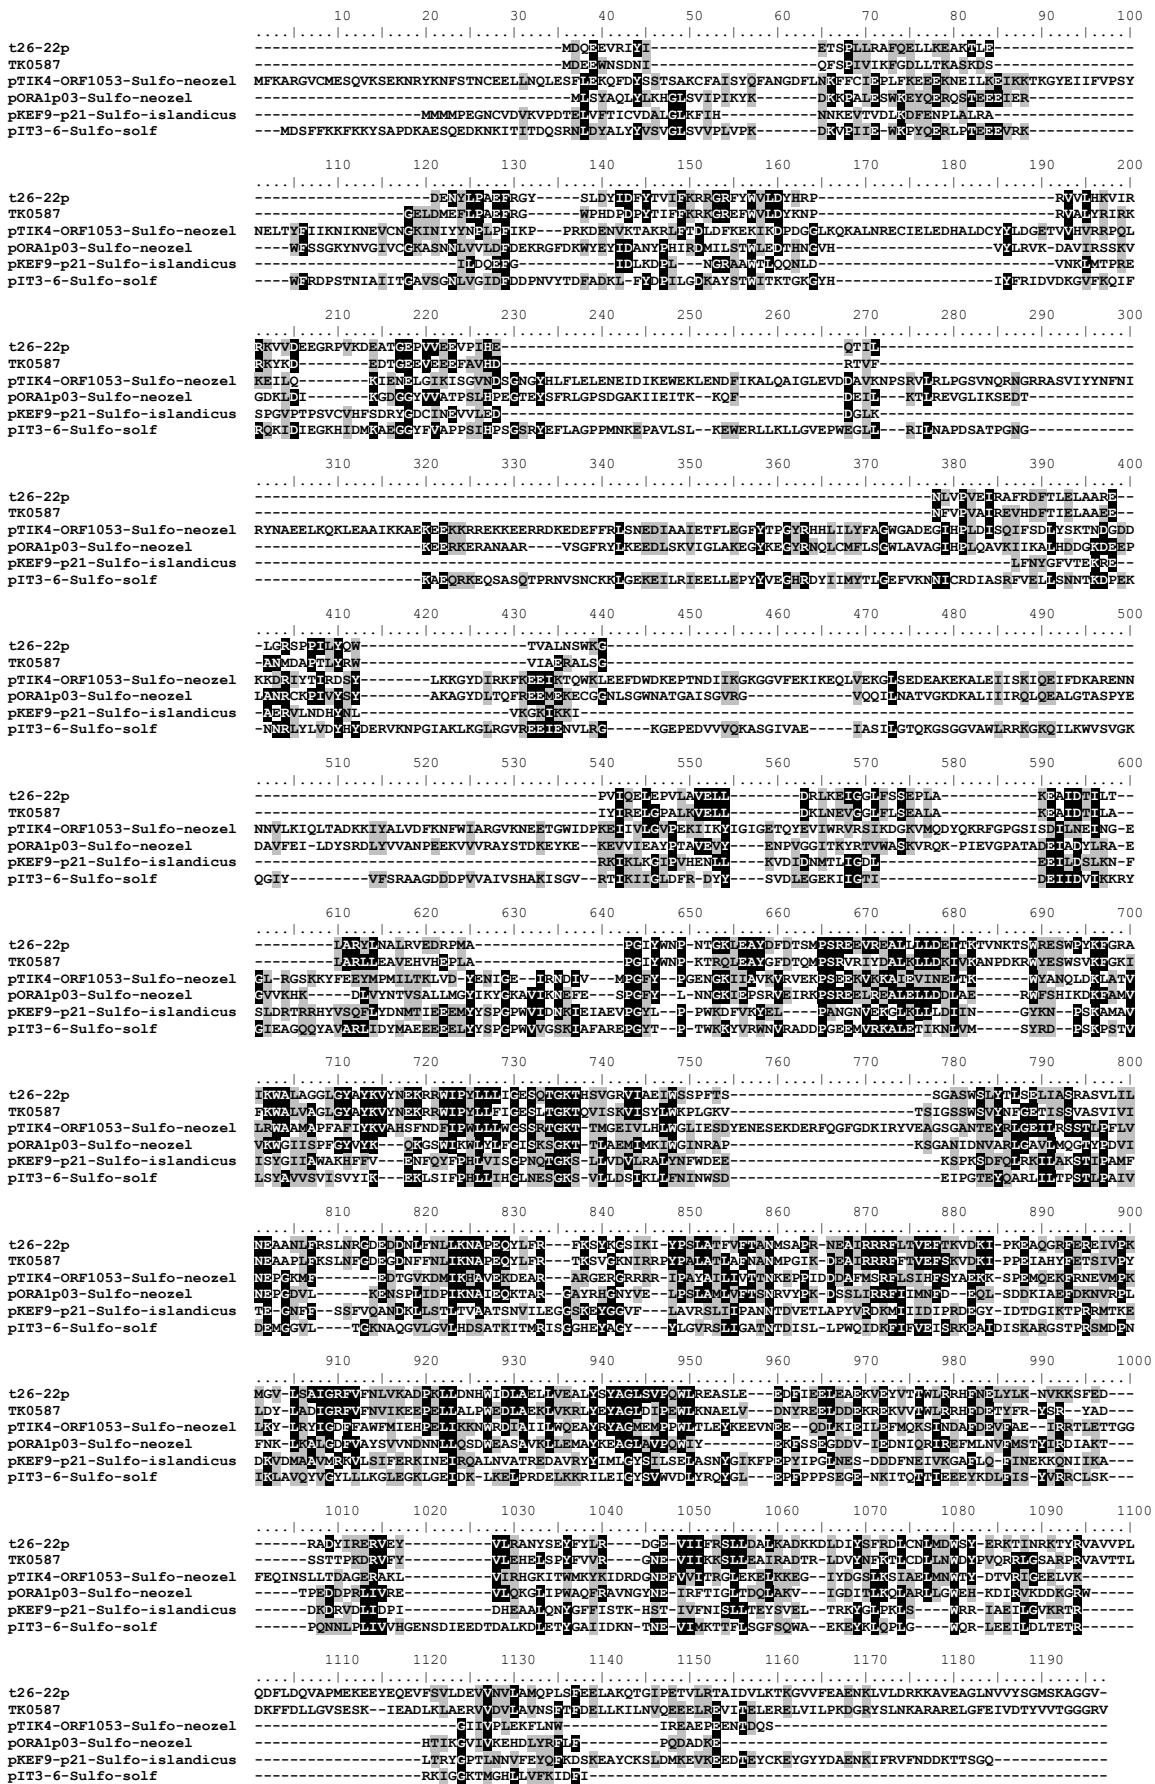

## Supplementary figure legends

### **Fig. S1. Skew analyses**

Cumulative GC skews graphics for pTN2, pP12-1 and pT26-2 genomes. (A) GC skew graphics starting as the plasmid was sequenced. The three plasmids show a GC frequency inversion exactly where a large intergenic region is found (purple arrows). (B) GC skew graphics starting at the large intergenic sequence (purple arrows). All three curves have rounded shapes.

### **Fig. S2. Origins of replication of the three plasmids.**

**A.** The complete sequences of the three plasmids were divided in windows of 60 bases pairs and the %GC of each window was calculated and visualized in a graphic representation. In green are shown the mean %GC of the genomes. For the three plasmids, the large intergenic region (the purple rectangle) that is found at the GC skew inversion (the purple arrow in the mini GC skew graphics) is localized in an AT rich zone.

**B.** Furthermore, the three AT rich large intergenic regions (in black and upper cased fonts) contain many sequences that are inverted and highly repeated (colored bases in the sequences and colored arrows). As expected, pTN2 and pP12-1 (close related plasmids) show similar organization with two large clusters of these inverted repeats, whereas pT26-2 has smaller clusters of interspersed inverted repeats. The coding regions next to these sequences (gray and lower cased font) do not contain inverted repeated sequences. These data clearly show that these intergenic regions are very likely the origin of replication in the three plasmids.

### **Fig. S3. Multiple alignment of Superfamily I helicases including tn2-1p and p12-1p sequences,**

performed with Muscle software after recovering homologous sequences by BLAST at the NCBI. Motives are indicated according to ref 34. Selected sequences are the following: *Thermococcus gammatolerans* YP\_002959996.1, *Thermococcus onnurineus* YP\_002307767.1, *Haloquadratum walsbyi* YP\_657138.1, *Halobacterium* sp. NRC-1 NP\_281177.1, *Thermoplasma volcanium* NP\_111258.1, *Ferroplasma acidarmanus* ZP\_01709967.1, *Methanococcus maripaludis* YP\_001329282.1, *Methanoculleus marisnigri* YP\_001047393.1, *Methanosarcina mazei* NP\_632214.1, *Cenarchaeum symbiosum* ABK77099.1, *Saccharomyces cerevisiae* NP\_012443.1, *Schizosaccharomyces pombe* NP\_594341.1, *Ostreococcus lucimarinus* CCE9901 XP\_001418014.1, *Trichomonas vaginalis* EAX99250.1, *Desulfovibrio vulgaris* YP\_968250.1, *Borrelia garinii* YP\_072790.1, *Aspergillus fumigatus* Af293 XP\_749523.1, *Helicobacter pylori* NP\_208269.1, *Aquifex aeolicus* NP\_213544.1, *Treponema pallidum* NP\_219465.1, *Planctomyces maris* ZP\_01856360.1, *Neisseria meningitidis* NP\_282882.1, *Escherichia coli* BAA00048.1, *Pseudomonas putida* YP\_001270562.1, *Anaeromyxobacter dehalogenans* YP\_463311.1, *Thermus thermophilus* BAA23380.1, *Deinococcus radiodurans* NP\_295498.1, *Chlorobium phaeobacteroides* ZP\_00531167.1, *Fusobacterium nucleatum* NP\_603489.1, *Clostridium perfringens* NP\_563176.1, *Bacillus subtilis* NP\_388543.1, *Staphylococcus aureus* YP\_041370.1

### **Fig. S4. Unrooted maximum likelihood tree of helicases related to UvrD/PcrA/Rep family (SFI).**

All complete archaeal sequences are present. One sequence for each eukaryal species encoding a homologue of these helicases was selected, and at least one sequence per bacterial phylum. 93 sequences were aligned and 152 homologous positions were selected for



tree calculation by PHYML (Guindon & Gascuel, 2003). The robustness of the tree was estimated by non-parametric bootstrap analysis (100 replicates). Scale bar represents the number of substitutions per site. Phyla are indicated on the right.

**Fig. S5 to S10.** Multiple alignments were performed with Muscle software after recovering sequences by BLAST or PSI-BLAST at the NCBI.

**Fig. S11. CAGs (Clusters of Atypical Genes) analysis of integrated elements in Thermococcales and Methanococcales genomes.**

**A. Genomic regions surrounding CAGs.** Blue columns represent atypical genes (assigned value = 1) whereas blanks between the columns represent non-atypical genes (assigned value = 0). The green horizontal lines above the graphics represent the core genes shared by these elements. Black arrows show the position of integrases and pink columns represent the tRNA genes.

**B. CAGs families.** pT26-2 (yellow), TKV2 (blue), TKV3 (blue), PHV1 (light blue), MMPV1, (orange) MMC7V1 (pink), MMC7V2 (pink) and MMC6V1 (mauve) share a core gene and their edges are colored in dark gray. These elements may show one or several links with integrated elements detected in other archaea (Cortez et al. Genome Biology 2009). Different thresholds were fixed to draw an edge between two elements, from 2 up to 5 shared genes. mmp is *M. maripaludis*, mmq is *M. maripaludis* C5, mmx is *M. maripaludis* C6, mmz is *M. maripaludis* C7, mja is *M. jannaschii* and mvn is *M. vanniellii*. Methanosarcinales: mac is *M. acetivorans* and mma is *M. mazei*. Halobacteriales: nph is *N. pharaonis*, hwa is *H. walsbyi*.

**Fig. S12. Unrooted maximum likelihood tree of core genes of the pT26-2 family of integrated elements.**

The proteins t26-5p, t26-6p, t26-11p, t26-13p and t26-14p were concatenated and aligned with the concatenation of their homologues among the integrated elements in Thermococcales and Methanococcales using Muscle software. 10 sequences were aligned and 1065 homologous positions were selected for tree calculation by PHYML (Guindon & Gascuel, 2003). The robustness of the tree was estimated by non-parametric bootstrap analysis (1000 replicates). Scale bar represents the number of substitutions per site.

**Fig. S13. Modules shuffling of Rep proteins from archaeal plasmids.** Homologous modules are in the same color.
